# Supplementary material
Source: Springer Nature journal article supplement (https://www.springermedizin.de/resource/supplementary/12877_2011_745_MOESM4_ESM.pdf/9440246)

Figure 1. Flowchart

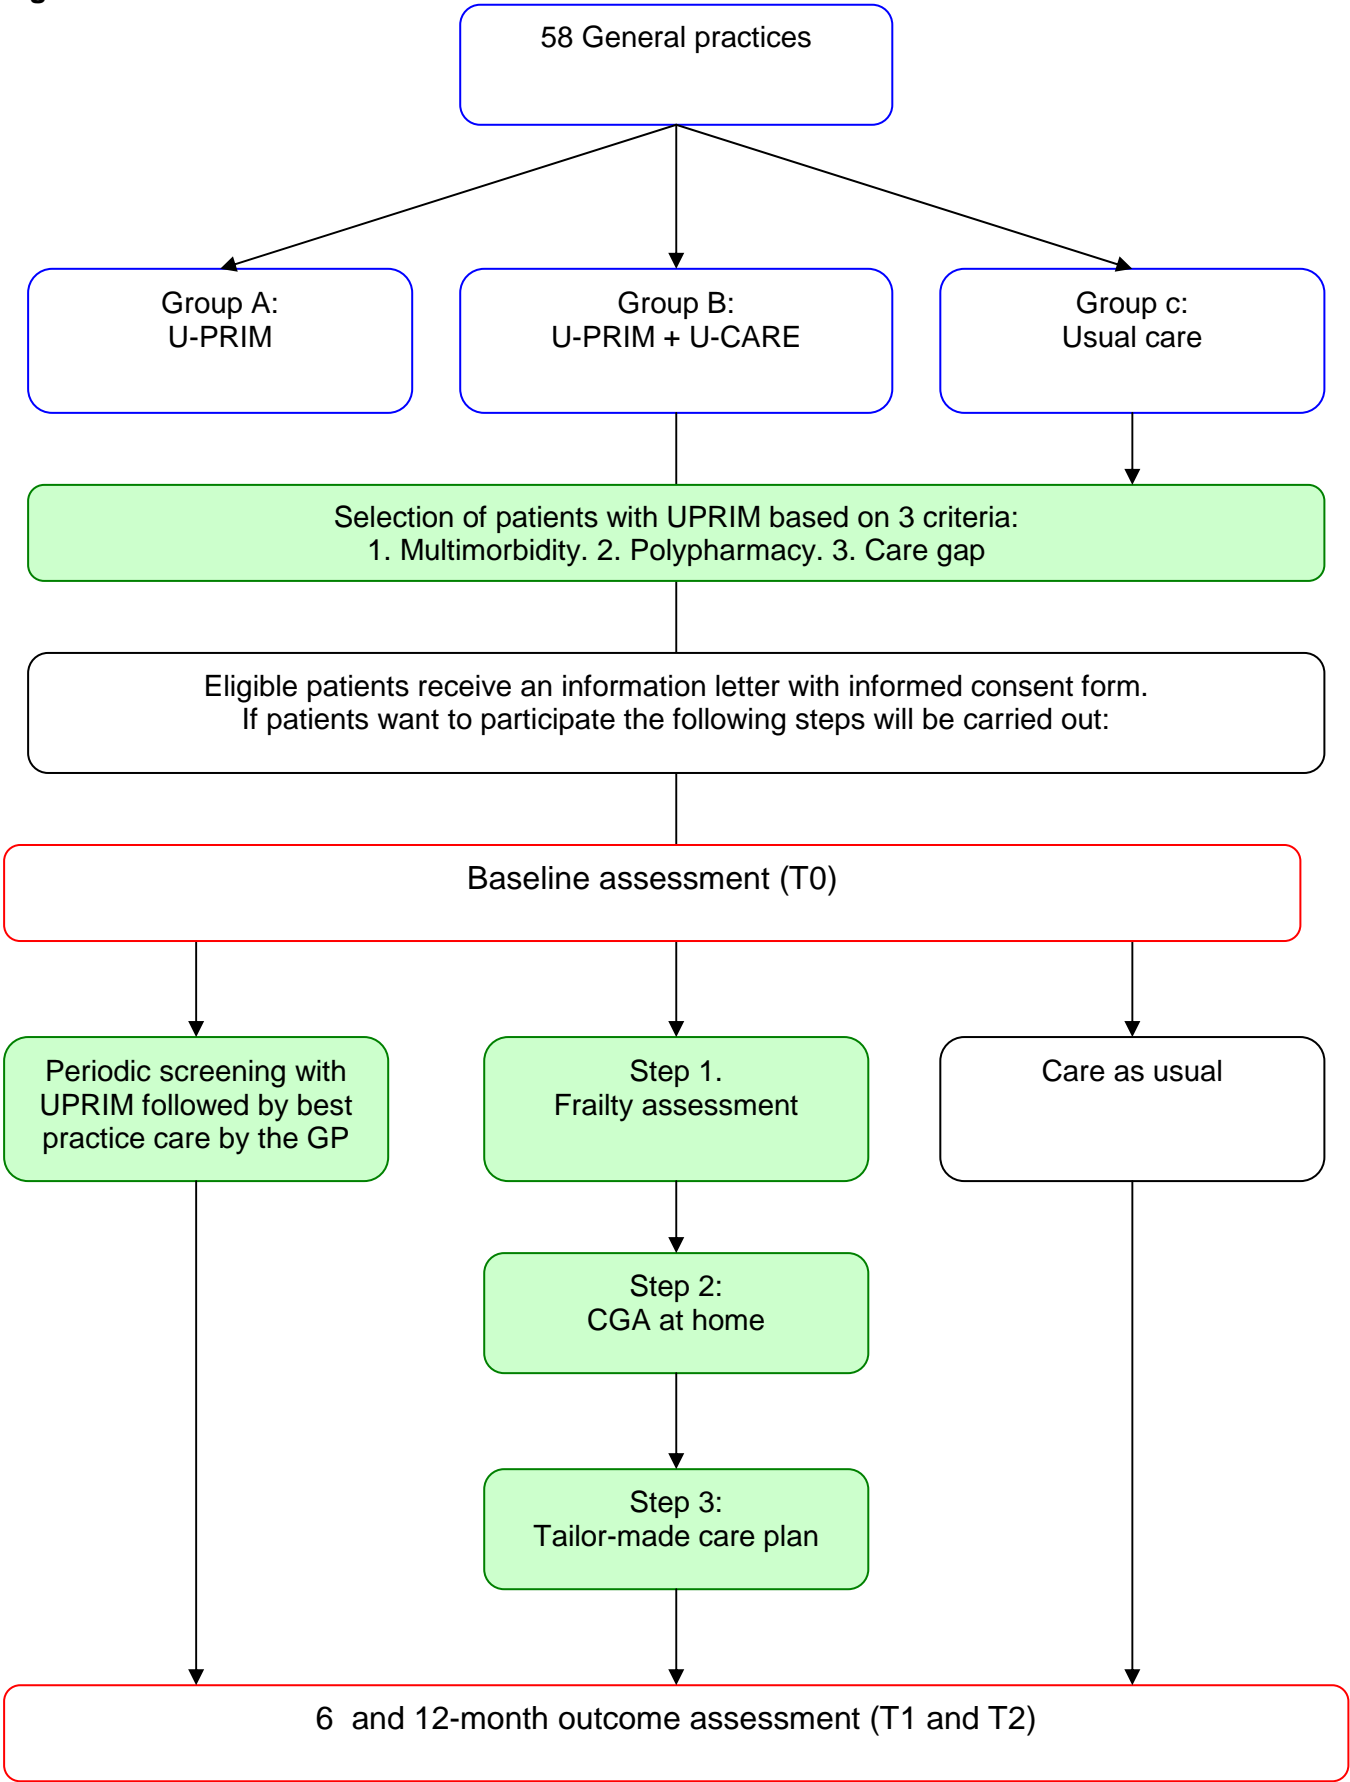

Supplement: MOESM4 [file 9440246]
